# Supplementary material for: Fate of single walled carbon nanotubes in wetland ecosystems
Source: Royal Society of Chemistry journal article supplement (doi:10.1039/c4en00063c), 2014-01-01
Supplement: c4en00063c1.pdf [file c4en00063c1.pdf]

## Supplementary information

### Fate of Single Walled Carbon Nanotubes in Wetland Ecosystems

Ariette Schierz<sup>1,2</sup>, Benjamin Espinasse<sup>1,2</sup>, Mark R. Wiesner<sup>1,2</sup>, Joseph H. Bisesi, Tara Sabo-Attwood, and P. Lee Ferguson<sup>1,2,4,\*</sup>

<sup>1</sup>*Department of Civil and Environmental Engineering, Duke University, Durham, North Carolina, USA.*

<sup>2</sup>*Center for the Environmental Implications of NanoTechnology (CEINT), Duke University, Durham, NC, USA.*

<sup>3</sup>*Department of Environmental and Global Health, Center for Environmental and Human Toxicology, University of Florida, Gainesville, FL, USA.*

<sup>4</sup>*Nicholas School of the Environment, Duke University, Durham, North Carolina, USA.*

(A)

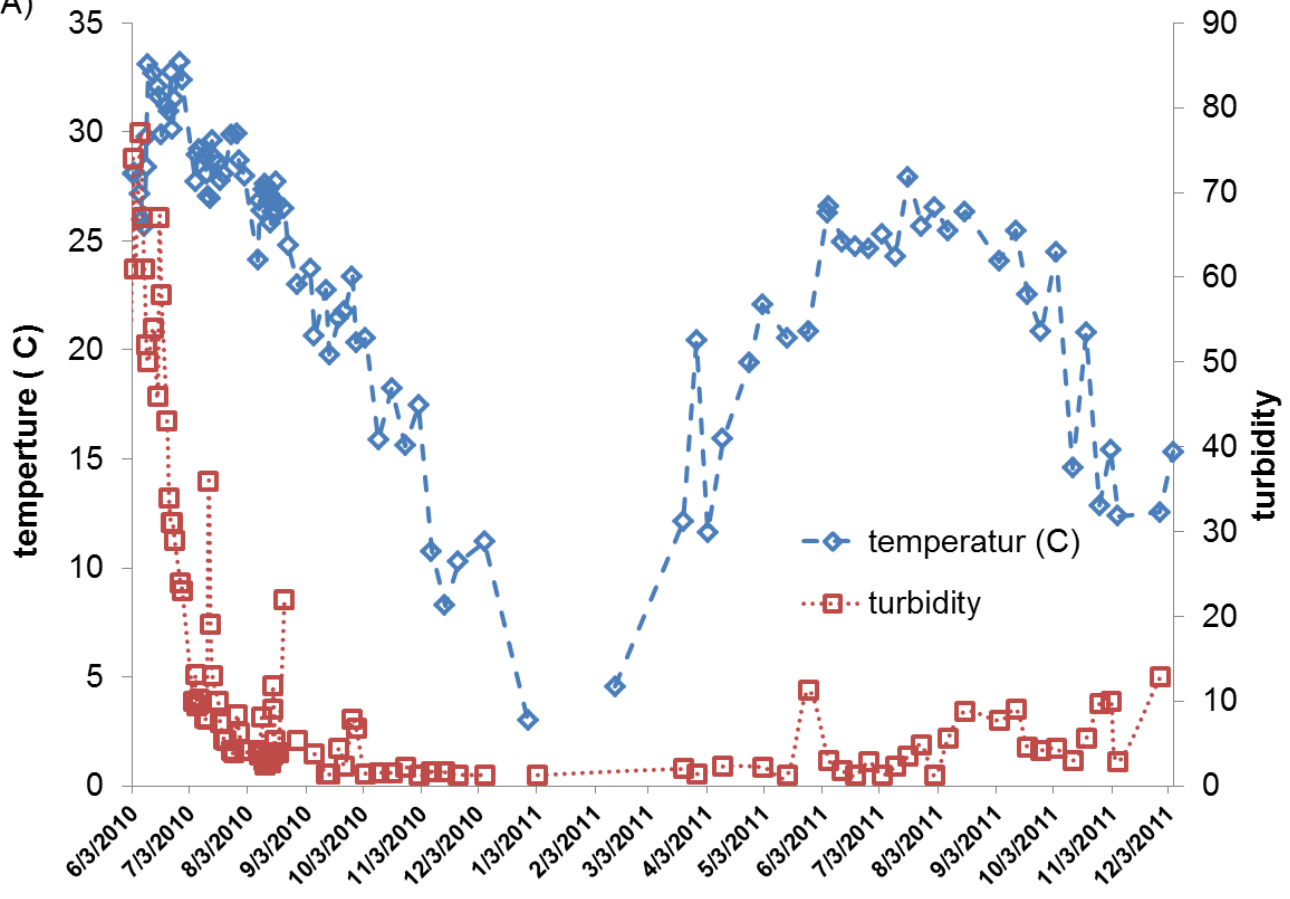

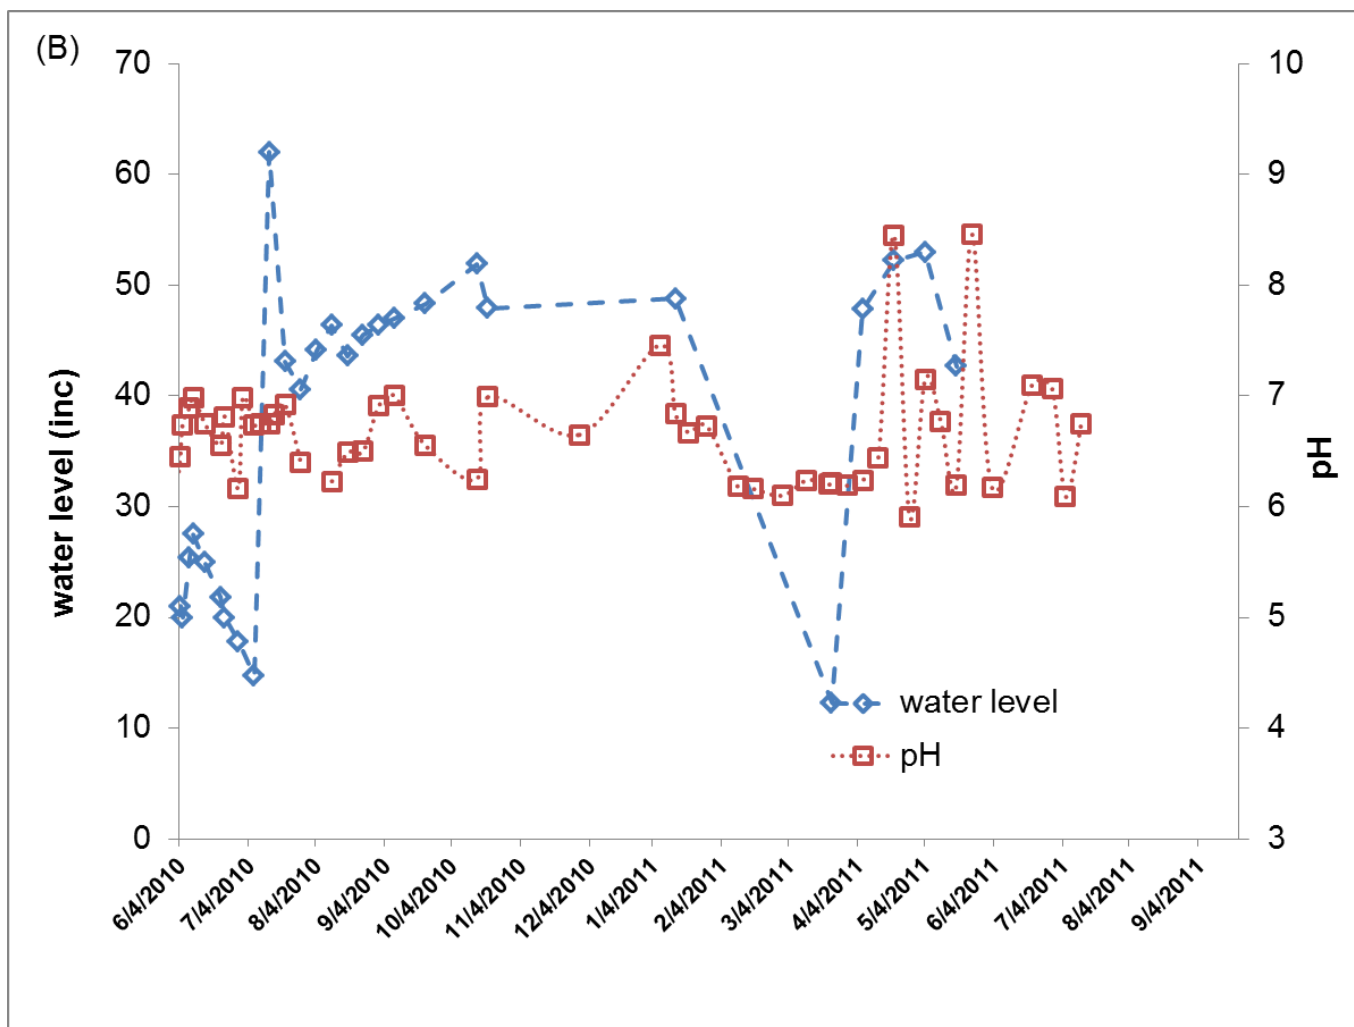

**Figure SI-1:** Water temperature and turbidity (A) and water level and pH (B) in SWNT mesocosm treatment pre and post-dosage. The experiment was initiated on August 16, 2010 by dosing SWNT SG65 suspended in 0.5% gum Arabic in the water column.

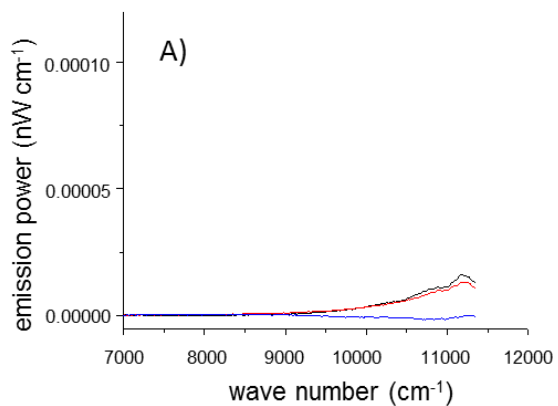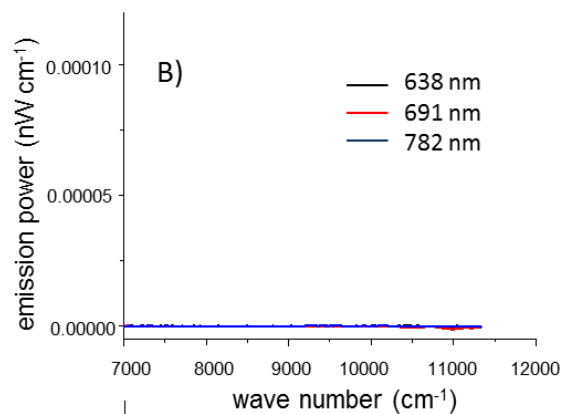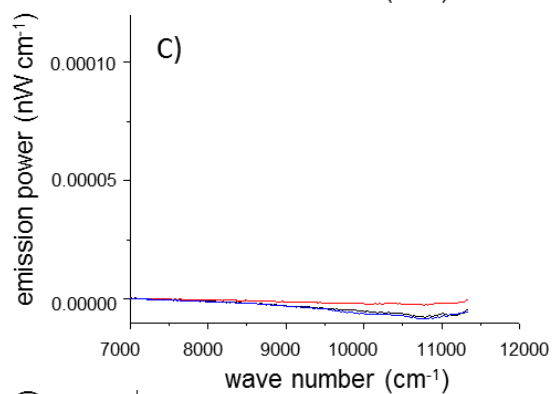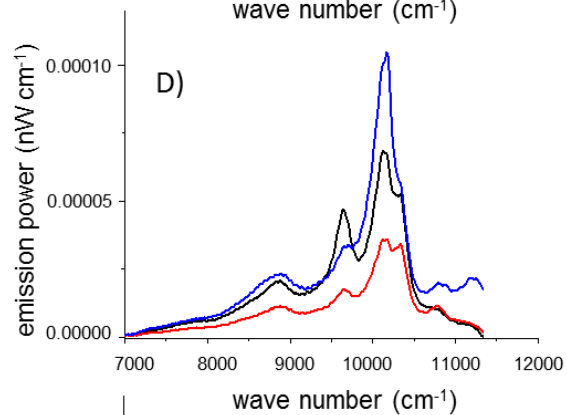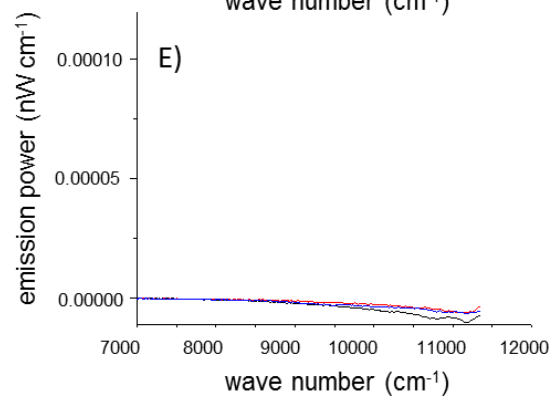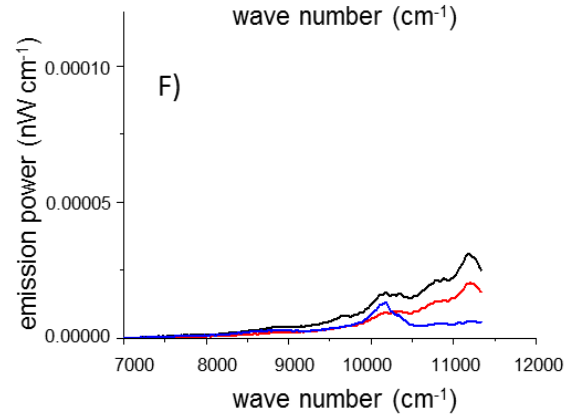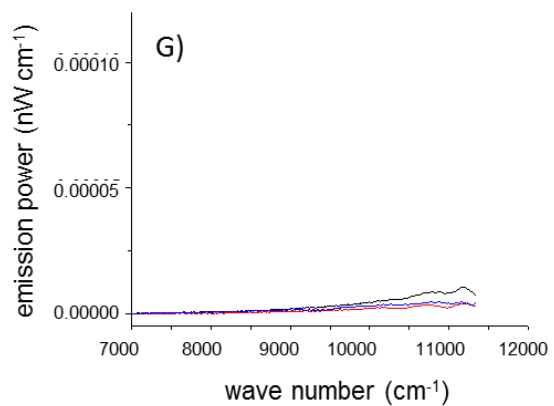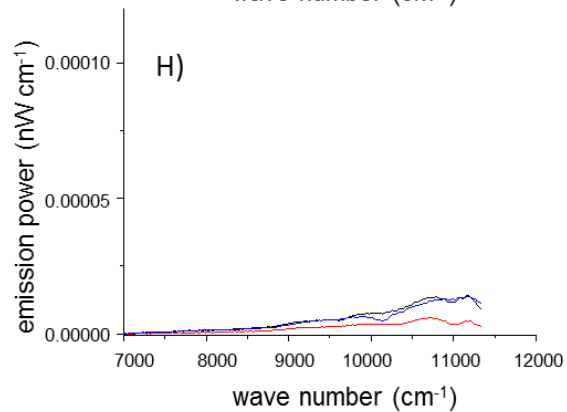

**Figure S12:** Representative NIRF-spectra of extracted sediment cores sections at in the aquatic (left) and terrestrial compartment (right) at water column (A,B 1-0 cm); depth 0- -1cm (C,D) ; -1 to -2 cm (E,F) and -2-3 cm (G,J) below sediment-water interface. Distribution of SWNT in aquatic and terrestrial sediment cores after 10 months.

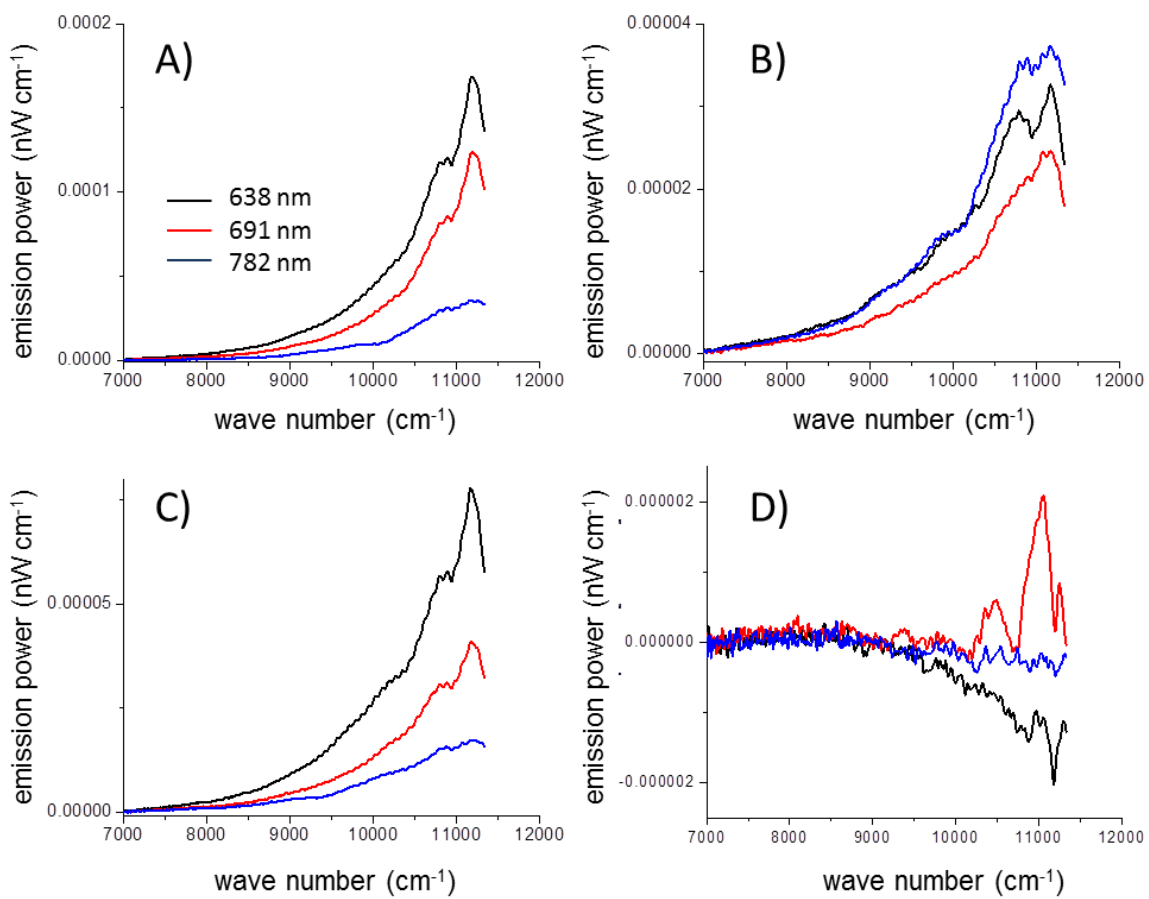

**Figure S13:** NIRF spectra of aquatic plant *Elodea* (waterweed) extracts (A) and *Lemna* (duckweed) (B), biofilm extracts (C) and mosquito fish extracts (D). NIRF spectra of plant samples show an elevated background signal possibly due to internal filter effects.

**Table S11:** Limits of quantification for different matrices for NIRF, Co and Mo (by ICP-MS)

| <b>matrix</b> | <b>MDL<sub>SWNT</sub><br/>ng g<sup>-1</sup></b> | <b>MDL<sub>Co</sub><br/>ng g<sup>-1</sup></b> | <b>MDL<sub>Mo</sub><br/>ng g<sup>-1</sup></b> | <b>MDL<br/>μg L<sup>-1</sup></b> |
|---------------|-------------------------------------------------|-----------------------------------------------|-----------------------------------------------|----------------------------------|
| sediment/soil | 500                                             | (1.8)**                                       | (0.03)**                                      |                                  |
| plants*       | 1140                                            | 16                                            | 340                                           |                                  |
| biofilm*      | 250                                             | 7                                             | 140                                           |                                  |
| fish*         | 780                                             | 30                                            | 630                                           |                                  |
| water         |                                                 |                                               |                                               | 5                                |

\*Normalized to wet weight (ng g<sup>-1</sup> wet weight)

\*\*Values reflect Co and Mo concentration in the sediment

**Table 2:** SWNT concentration in surficial-sediment in the aquatic compartment [depth: 0- 1 cm] at 8, 10, and 12 months post SWNT amendment (n=3-8, from different locations), \*NIRF spectra showed indication for presence of SWNT, but the concentration were below limit of quantification, sampling locations were assigned randomly, sediment cores C5-1, C5-2 and C5-3 were retrieved within 10 cm radius.

| sampling date  | April 2011<br>8 months                                                 |     | June 2011<br>10 months                                                 |      | August 2011<br>12 months                                               |     |
|----------------|------------------------------------------------------------------------|-----|------------------------------------------------------------------------|------|------------------------------------------------------------------------|-----|
| Replicate Core | $m_{\text{SWNT}}/m_{\text{sed}}$<br>[ $\mu\text{g/g}$ dry<br>sediment] | SD  | $m_{\text{SWNT}}/m_{\text{sed}}$<br>[ $\mu\text{g/g}$ dry<br>sediment] | SD   | $m_{\text{SWNT}}/m_{\text{sed}}$<br>[ $\mu\text{g/g}$ dry<br>sediment] | SD  |
| C1             | 9.4                                                                    | 1.4 | 2.7                                                                    | 0.9  | 25.1                                                                   | 6.3 |
| C2             | 5.1                                                                    | 1.4 | 20.2                                                                   | 11.8 | 6.2                                                                    | 3.6 |
| C3             | 13.5                                                                   | 4.0 | 61.2                                                                   | 8.8  | 17.7                                                                   | 6.0 |
| C4             |                                                                        |     | <LOQ*                                                                  |      | <LOQ*                                                                  |     |
| C5 -1          |                                                                        |     | 10.3                                                                   | 2.1  | <LOQ*                                                                  |     |
| C5 -2          |                                                                        |     | 5.8                                                                    | 1    |                                                                        |     |
| C5 -3          |                                                                        |     | 6.9*                                                                   | 3    |                                                                        |     |
| C6             |                                                                        |     | 1.9                                                                    | 0.5  |                                                                        |     |
